# Supplementary material for: Seasonal variations of the ichthyoplankton assemblage in the Yangtze Estuary and its relationship with environmental factors
Source: PeerJ. 2019 Feb 21;7:e6482. doi: 10.7717/peerj.6482 (PMC6387755; doi:10.7717/peerj.6482)
Supplement: Supplemental Information 2 [file peerj-07-6482-s002.xlsx]

## Sheet: Biological Raw Data
Spring			Summer			Autumn			Winter
Station	Species	Numbers	Station	Species	Numbers	Station	Species	Numbers
10	Engraulis japonicus	19	17	Engraulis japonicus	20	02	Hyporhamphus sajori	1
09	Engraulis japonicus	5	23	Engraulis japonicus	6		Atherina bleekeri	1
	Egg	40	30	Engraulis japonicus	72	30	Stolephorus commersonnii	2
27	Engraulis japonicus	27	37	Engraulis japonicus	18		Engraulis japonicus	23
30	Engraulis japonicus	308				10	Trichiurus japonicus	1
18	Engraulis japonicus	4	36	Engraulis japonicus	29	19	Engraulis japonicus	6
22	Engraulis japonicus	128				37	Engraulis japonicus	24
04	Engraulis japonicus	1	13	Egg	46	23	Coilia nasus	1
05	Minous monodactylus	1	16	Engraulis japonicus	3	11	Atherina bleekeri	1
12	Engraulis japonicus	15	21	Coilia nasus	4	34	Chelidonichthys spinosus	1
16	Engraulis japonicus	9	40	Coilia nasus	8		Coilia nasus	2
17	Egg	66	35	Atherina bleekeri	1		Atherina bleekeri	1
11	Engraulis japonicus	11		Engraulis japonicus	18	36	Engraulis japonicus	1
20	Engraulis japonicus	2	25	Coilia nasus	3	21	Atherina bleekeri	1
	Egg	169	23	Chelidonichthys spinosus	1	16	Stolephorus commersonnii	2
			28	Coilia nasus	3	24	Syngnathus acua	2
15	Engraulis japonicus	48	05	Coilia nasus	1		Engraulis japonicus	1
	Chelidonichthys spinosus	15	31	Stolephorus commersonnii	1	31	Syngnathus acua	1
25	Engraulis japonicus	1	24	Egg	38	08	Hyporhamphus sajori	2
40	Engraulis japonicus	43	29	Coilia nasus	12	07	Hyporhamphus sajori	1
	Egg	158	06	Engraulis japonicus	1	28	Syngnathus acua	1
08	Engraulis japonicus	1013	32	Egg	18
	Atherina bleekeri	1	07	Egg	28
	Chelidonichthys spinosus	3	30	Coilia nasus	2
	Larimichthys polyactis	6	33	Egg	18
			11	Coilia nasus	15
23	Engraulis japonicus	8
13	Engraulis japonicus	9
24	Larimichthys polyactis	1
28	Engraulis japonicus	47
	Larimichthys polyactis	6
21	Atherina bleekeri	1
	Stolephorus commersonnii	1
29	Stolephorus commersonnii	8
	Atherina bleekeri	2
	Engraulis japonicus	163
30	Engraulis japonicus	48
	Atherina bleekeri	20
32	Engraulis japonicus	89
19	Egg	108
	Scomber japonicus	1
